# Supplementary material for: On the Origin of the Treponematoses: A Phylogenetic Approach
Source: PLoS Negl Trop Dis. 2008 Jan 15;2(1):e148. doi: 10.1371/journal.pntd.0000148 (PMC2217670; doi:10.1371/journal.pntd.0000148)
Supplement: Table S2 — Polymorphism table. (0.07 MB XLS) [file pntd.0000148.s003.xls]

## Sheet: Sheet1
Strain\Gene	IGR(fliG-tp0027)			cysS	tp0106			tp0123					IGR(tp0129-tp0130)			IGR(tp0135-tp0136)						deoD		gpd		tp92															tp0347						IGR(cheY-tp0367)
BOSNIA	-	G	T	A	C	G	C	C	G	C	T	G	G	G	T	-	G	C	T	G	A	T	T	A	G	C	C	T	T	G	T	C	C	C	G	T	C	C	C	C	C	T	G	-	A	A	G	C	G
IRAQ	-	G	T	A	C	G	C	C	G	C	T	G	G	G	T	-	G	C	T	G	A	T	T	A	G	C	C	T	T	G	T	C	C	C	G	T	C	C	C	C	C	T	G	-	A	A	G	C	G
BRAZZAVILLE	-	G	T	A	C	G	C	C	G	C	T	G	G	G	T	-	G	C	T	G	A	T	T	A	G	C	C	C	T	G	T	C	-	C	G	T	C	G	C	C	C	T	G	-	A	G	G	C	G
CDC1	-	G	T	A	C	G	C	C	G	C	T	G	G	G	T	-	G	C	T	G	A	T	T	A	G	C	C	T	T	G	T	C	-	C	A	T	C	G	C	C	C	T	-	-	A	G	G	C	G
CDC2	-	G	T	A	C	G	C	C	G	C	T	G	G	G	T	-	G	C	T	G	A	T	T	A	G	C	C	T	T	G	T	C	-	C	G	T	C	G	C	C	C	T	G	-	A	G	G	C	G
CDC2575	-	G	T	A	C	G	C	C	G	C	T	G	G	G	T	-	G	C	T	G	A	T	T	A	G	C	C	T	T	G	T	C	-	C	A	T	C	G	C	C	C	T	-	-	A	G	G	C	G
GAUTHIER	-	G	T	A	C	G	C	C	G	C	T	G	G	G	T	-	G	C	T	G	A	T	T	A	G	C	C	C	T	G	T	C	-	C	G	T	C	G	C	C	C	T	G	-	A	G	G	C	G
GHANA	-	G	T	A	C	G	C	C	G	C	T	G	G	G	T	-	G	C	T	G	A	T	T	A	G	C	C	T	T	G	T	C	-	C	A	T	C	G	C	C	C	T	-	-	A	G	G	C	G
PARIAMAN	-	G	T	A	C	G	C	C	G	T	T	G	G	G	T	-	G	C	T	G	A	T	T	A	G	C	A	T	T	G	T	C	-	C	G	T	C	G	C	C	C	T	G	-	A	G	G	C	G
SAMOA D	-	G	T	A	C	G	C	C	G	C	T	G	G	G	T	-	G	C	T	G	A	T	T	A	G	C	C	T	T	G	T	C	-	C	G	T	C	G	C	C	C	T	G	-	A	G	G	C	G
SAMOA F	-	G	T	A	C	G	C	C	G	C	T	G	G	G	T	-	G	C	T	G	A	T	T	A	G	C	C	T	T	G	T	C	-	C	G	T	C	G	C	C	C	T	G	-	A	G	G	C	G
SIMIAN	-	G	T	A	T	G	C	C	G	C	T	G	G	G	T	-	G	C	T	G	A	T	T	A	G	C	C	T	T	G	T	C	-	C	G	T	C	G	C	C	C	T	G	-	A	G	G	C	G
CHICAGO B	G	G	C	A	C	G	C	C	G	C	T	G	G	G	T	C	G	C	T	G	A	T	C	A	A	C	C	T	T	G	T	C	A	C	G	T	C	C	C	C	C	T	G	-	A	G	C	C	T
DALLAS	G	G	C	A	C	G	C	C	G	C	T	G	G	G	T	-	G	C	T	G	A	T	C	A	A	C	C	T	T	G	T	C	A	C	G	T	C	C	C	C	C	T	G	-	A	G	C	C	T
GRADY	G	G	C	A	C	G	C	C	G	C	T	G	G	G	T	-	G	C	T	G	A	T	C	A	A	C	C	T	G	G	T	C	C	C	G	T	C	C	C	C	C	T	G	-	A	G	C	C	T
HAITI B	G	G	C	A	C	G	C	C	G	C	T	G	G	G	T	C	G	C	T	G	A	T	C	A	A	T	C	T	T	G	T	C	C	C	G	T	C	C	C	C	C	T	G	-	A	G	C	C	T
MADRAS	G	G	C	A	C	G	C	C	G	C	T	G	G	G	T	C	G	C	T	G	A	T	C	A	A	C	C	T	T	G	T	C	A	C	G	T	C	C	C	C	C	T	G	-	A	G	C	C	T
MEXICO A	G	G	C	A	C	G	C	C	G	C	T	G	G	G	T	-	G	C	T	G	A	T	C	A	A	C	C	T	G	G	T	C	A	C	G	T	C	G	C	C	C	T	G	-	A	G	C	C	T
NICHOLS	G	G	C	A	C	G	C	C	G	C	T	G	G	G	T	-	G	C	T	G	A	T	C	A	A	C	C	T	T	G	T	C	-	C	G	T	C	C	C	C	C	T	G	-	A	G	C	C	T
PHILADELPHIA 1	G	G	C	A	C	G	C	C	G	C	T	G	G	G	T	-	G	C	T	G	A	T	C	A	A	C	C	T	G	G	T	C	C	C	G	T	C	C	C	C	C	T	G	-	A	G	C	C	T
SOUTH AFRICA	G	G	C	A	C	G	C	C	G	C	T	G	G	G	T	-	G	C	T	G	A	T	C	A	A	C	C	T	G	G	T	C	-	C	G	T	C	G	C	C	C	T	G	-	A	G	C	C	T
TPC A	-	A	T	G	C	A	T	T	A	C	C	A	T	T	-	-	G	T	-	A	G	C	T	G	G	C	C	T	T	A	T	C	-	-	G	C	T	G	A	A	G	C	G	A	G	G	C	T	G
TPC H	-	A	T	G	C	A	T	T	A	C	C	A	T	T	-	-	G	T	-	A	G	C	T	G	G	C	C	T	T	A	C	G	-	-	G	C	T	G	A	A	G	C	G	A	G	G	C	T	G
TPC M	-	A	T	G	C	A	T	T	A	C	C	A	T	T	-	-	A	T	-	A	G	C	T	G	G	C	C	T	T	A	T	G	-	-	G	C	T	G	A	A	G	C	G	A	G	G	C	T	G
Class of Substitution	D	I	I	S	S	S	S	N	N	N	S	N	I	I	I	I	I	I	I	I	I	S	S	S	S	N	N	N	N	S	N	N	N/D	D	N	N	S	N	N/A	N/A	N	S	D	D	N	S	I	I	I
I=Intergenic
S=Synonymous
N=Non-synonymous
D=Deletion	*Only 1st nucleotide of indels is presented above
																																	D: 2384-2398
Nucleotide Position In Gene/Genetic Region	45-47	51	98	528	81	183	288	451	561	580	591	614	189	213	276-281	50-112	51	82	93-96	99	283	744	759	459	579	1592	1964	1966	1967	2010	2101	2326	2388	2382 -2399	2405	2408	2421	2494	2495	2496	16	84	107	110-126	131	210	20	43	115
Codon Substitution				GGA->GGG	TCC->TCT	ACG->ACA	ACC->ACT	CAT->TAT	ATG->ATA	CTT->TTT	TGT->TGC	GGG->GAG										GTT->GTC	AGC->AGT	GAA->GAG	CAA->CAG	GCG->GTG	CCC->CAC	TTT->CTT	TTT->TGT	GAG->GAA	TAT->CAT	CAG->GAG	AGA->AGC		GGA->GAA	CTG->CCG	AGC->AGT	GCC->CCC	GCC->GAA	GCC->GAA	CGG->GGG	TGT->TGC			AAG->AGG	CTG->CTA
Amino Acid Substitution								HIS->TYR	MET->ILE	LEU->PHE		GLY->GLU														ALA->VAL	PRO->HIS	PHE->LEU	PHE->CYS		TYR->HIS	GLN->GLU	ARG->SER		GLY->GLU	LEU->PRO		ALA->PRO	ALA->GLU		ARG->GLY				LYS->ARG
Radical or Conservative Amino Acid Change?								R	C	C		R														C	R	C	R		R	C	R		R	C		C	R		R				C
[truncated: 35 more columns]
